# Supplementary material for: A four-gene signature predicts survival and anti-CTLA4 immunotherapeutic responses based on immune classification of melanoma
Source: PubMed Central journal article supplement (PMC7985195; doi:10.1038/s42003-021-01911-x), 2021-03-22
Supplement: 42003_2021_1911_MOESM2_ESM.pdf [file 42003_2021_1911_MOESM2_ESM.pdf]

## **Description of Additional Supplementary Files**

**File name:** Supplementary Data 1

**Description:** 28 immune-associated gene sets.

**File name:** Supplementary Data 2

**Description:** Differentially expressed genes between L and H subtypes.

**File name:** Supplementary Data 3

**Description:** Source data for Figures 1-6.
